## RESEARCH ARTICLE

# Abundance and diversity of aerobic heterotrophic microorganisms and their interaction with cyanobacteria in the oxic layer of an intertidal hypersaline cyanobacterial mat

Raeid M. M. Abed<sup>1,\*</sup>, Katharina Kohls<sup>2</sup>, Julie Leloup<sup>3</sup> and Dirk de Beer<sup>2</sup>

<sup>1</sup>College of Science, Biology Department, Sultan Qaboos University, Al Khoud, PC 123, Muscat, Sultanate of Oman, <sup>2</sup>Max Planck Institute for Marine Microbiology, Celsiusstrasse 1, D-28359 Bremen, Germany and <sup>3</sup>Sorbonne Universités, UPMC Univ Paris 06, CNRS-IRD-INRA-P7-UPEC, Institute of Ecology and Environmental Sciences, Paris, 4 place Jussieu, 75005 Paris, France

\*Corresponding author: College of Science, Biology Department, Sultan Qaboos University, P.O. Box 36, Al Khoud, PC 123, Muscat, Sultanate of Oman. Tel: +968-24141450. E-mail: [rabad@mpi-bremen.de](mailto:rabad@mpi-bremen.de)

**One sentence summary:** This study used a suite of culture-dependent and independent approaches to study diversity and abundance of aerobic heterotrophs and their interaction with cyanobacteria.

**Editor:** Hendrikus Laanbroek

## ABSTRACT

Aerobic heterotrophic microorganisms (AH) play a significant role in carbon cycling in cyanobacterial mats; however, little is known about their abundance, diversity and interaction with cyanobacteria. Using catalyzed reporter deposition fluorescence *in situ* hybridization (CARD-FISH), bacterial counts in the mat's oxic layer reached a mean of  $2.23 \pm 0.4 \times 10^{10}$  cells  $g^{-1}$ . Cultivation of AH yielded strains belonging to *Actinobacteria*, *Bacteroidetes*, *Firmicutes*, *Gammaproteobacteria* and *Haloarchaea*. 16S rRNA bacterial sequences retrieved from the mat's oxic layer were related to *Bacteroidetes*, *Chloroflexi* and *Proteobacteria*, whereas archaeal sequences belonged to *Crenarchaeota* and *Haloarchaea*. Monocultures of cyanobacteria from the same mat were associated with different AH, although *Bacteroidetes* were found in most cultures. CARD-FISH showed that *Bacteroidetes*- and *Chloroflexi*-related bacteria were closely associated with filaments of *Microcoleus chthonoplastes*. The growth of an axenic culture of *M. chthonoplastes* PCC7420 was stimulated on the addition of a filtrate obtained from a non-axenic *Microcoleus* culture and containing only AH and released substances. In contrast, a similar filtrate from a non-axenic *Cyanothece*-related culture killed *Cyanothece* PCC 7418. We conclude that a diverse community of AH exist in close association with cyanobacteria in microbial mats and the interactions between AH and cyanobacteria are species-specific and involve the release of substances.

**Keywords:** cyanobacterial mats; aerobic heterotrophs; archaea; qPCR; CARD-FISH; Cyanobacteria

## INTRODUCTION

The uppermost oxic layer of cyanobacterial mats is mainly inhabited by cyanobacteria and aerobic heterotrophic microor-

ganisms (AH), and is the most active part of the mat in volumetric carbon cycling (Ley *et al.* 2006). AH are important for the degradation part of the carbon cycle within mats (van Gemerden 1993). Their respiratory activity is closely coupled to

cyanobacterial photosynthesis even under varying conditions of salinity, temperature and irradiance (Wieland and Kühl 2000; Grötzschel et al. 2002; Abed et al. 2006; Abed, Kohls and de Beer 2007). This is probably due to their ability to grow on cyanobacterial exudates (Bateson and Ward 1988; Grötzschel et al. 2002). Using enrichment cultivation and substrate spectra of obtained isolates, different functional guilds of AH specialized in the consumption of specific cyanobacterial exudates have been identified (Jonkers and Abed 2003; Abed et al. 2007). Most probable number counts showed a numerical abundance of AH in the range of  $1.15\text{--}8.13 \times 10^6$  cells  $g^{-1}$  and obtained isolates belonged to the genera *Marinobacter*, *Halomonas*, *Porphyrobacter*, *Roseobacter*, *Rhodobacter* and *Alcanivorax* (Jonkers and Abed 2003; Abed et al. 2007; Hube, Heyduck-Söller and Fischer 2009). Despite the significant role of AH in microbial mats, little research has been performed to investigate their abundance (depth distribution) and diversity using culture-independent molecular techniques. In particular, the diversity of archaea in the oxic part of hypersaline microbial mats has received little attention (Jahnke et al. 2008; Robertsen et al. 2009; Wong et al. 2016).

The relationships between cyanobacteria and AH can be competitive for scarce nutrients and other resources, or mutualistic stimulating the survival and persistence of each other (Paerl 1996). For instance, too high oxygen concentrations, evolved during cyanobacterial photosynthesis, can inhibit several metabolic and biosynthetic pathways of cyanobacteria. It is thought that AH counteract the chemical changes in  $O_2$ ,  $CO_2$  and pH induced by photosynthesis via respiration activities (Carr and Whitton 1973; Wieland and Kühl 2006). Cyanobacteria and associated AH were shown to exchange vitamins, other growth factors as well as nitrogen and carbon sources, leading to enhanced cyanobacterial growth (Burkholder 1963; Paerl 1982; Steppe et al. 1996). Unlike these beneficial interactions, some studies reported the lysis of cyanobacterial filaments by associated gliding bacteria (Shilo 1970; Rashidan and Bird 2001). Furthermore, AH are thought to play a significant role in carbon cycling through direct utilization of cyanobacterial exudates and regeneration of  $CO_2$  required for cyanobacterial photosynthesis (Lange 1967; Bauld and Brock 1974; Paerl 1976; Herbst and Overbeck 1978; Cole 1982; Bateson and Ward 1988; Baines and Pace 1991; Wang and Priscu 1994; Epping, Khalili and Thar 1999; Kirkwood, Nalewajko and Fulthorpe 2006). Indeed, recent studies have clearly demonstrated, using stable isotope imaging based on nanometer scale secondary ion mass spectrometry (NanoSIMS), the ability of AH to assimilate carbon and nitrogen fixed by cyanobacteria (Behrens et al. 2008; Pett-Ridge and Weber 2012). All these studies suggest a complex and manifold relationship between AH and cyanobacteria; thus, it becomes clear that a gap still exists in our knowledge of the microbial communities surrounding cyanobacteria.

This study aimed at identifying and quantifying the bacterial and archaeal populations in the fully oxic layer of a hypersaline cyanobacterial mat from Abu Dhabi (UAE) using culture-dependent and independent approaches. We also identified AH in different monoclonal cyanobacterial cultures obtained from the same microbial mat, using denaturing gradient gel electrophoresis (DGGE), with the aim to find out whether different cyanobacteria have similar or different (species-specific) associated AH. The distribution of AH around cyanobacterial filaments was further studied using catalyzed reporter deposition fluorescent in situ hybridization (CARD-FISH), and the interaction between the two groups was investigated using co-cultivation growth experiments under different conditions.

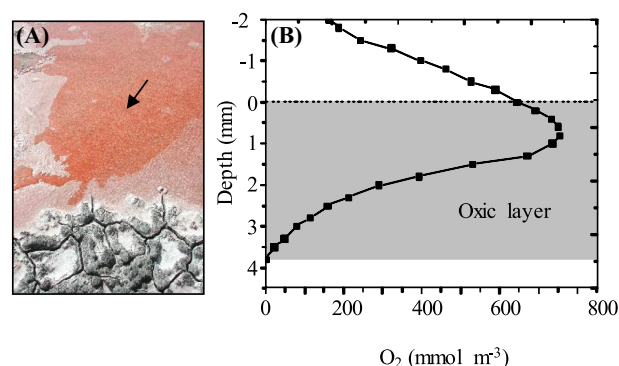

Figure 1. (A) A field photograph showing (arrow) the hypersaline microbial mat from the upper intertidal zone used in this study, (B) oxygen microsensor profile of the mat in the light; shaded area highlights the oxic part of the mat.

## MATERIAL AND METHODS

### Mats origin and determination of the oxic layer

Mats pieces ( $8 \times 15$  cm) were sampled from the upper (termed as gelatinous mat in Abed et al. 2008) intertidal flats of Abu Dhabi (Arabian Gulf coast, United Arab Emirates) during low tide (Fig. 1A and B). Air temperature in the region typically reaches over  $50^\circ C$  during hot summers and between  $15^\circ C$  and  $35^\circ C$  in winter. The salinity of the mat's overlying water fluctuated between 6% and 20% as measured during low and high tide using a portable refractometer. The water temperature was  $32^\circ C$  at the time of sampling. Collected samples were stored at  $-80^\circ C$  for further molecular analysis, but some samples were kept alive in aquaria for cultivation of microorganisms. We used only the oxic layer of the mats for our study, which was found to be 3.5 mm thick as determined by an oxygen microelectrode (Fig. 1B). This layer was excised under a dissecting microscope with a clean scalpel blade and sterile forceps. This delimited the analyses to populations that are potentially active as AH.

### Quantification by qPCR

Depth distribution and abundance of bacterial and archaeal 16S rRNA genes in the excised oxic layer of the mats were studied using qPCR. The anoxic layer of the mat was also included in the analysis for comparison. Mat pieces were incubated in O.C.T. compound (Plano) at  $4^\circ C$  for 24 h. The mat pieces were then transferred into cryotrays and left at  $-20^\circ C$  for 5 h. Thin sections ( $250\text{--}500 \mu m$ ) were prepared using a cryomicrotome (HM 505E, Microm) at  $-31^\circ C$ . Each layer was subjected to nucleic acid extraction after Lueders, Manefield and Friedrich (2004). qPCR for the bacterial 16S rRNA genes was performed using TaqMan probe 6-FAM-5'-CGTATTACCGGGCTGCTGGCAC-3'-dark quencher and the primer sets 331F and 797R at the PCR conditions described by Nadkarni et al. (2002). The archaeal 16S rRNA genes were quantified using the probe Arch516F and the primer set ARCH349F and ARCH806R as described by Takai and Horikoshi (2000). The assays were performed on a Bio-Rad IQ5 (Bio-Rad, Germany). The PCR reaction was performed in a total volume of  $25 \mu l$  using the TaqMan Universal PCR Master Mix (Eurogentec), containing 100 nM each of the universal forward and reverse primers and  $1 \mu l$  10-fold dilution of sample DNA solution (10 ng). The standard was a DNA mixture of different archaeal and bacterial strains. Standard curves for each assay were constructed on the basis of serial 10-fold dilutions of DNA mixtures containing around  $1 \times 10^{10}$  copies. Only standard curves with

regression coefficient values  $>0.98$  were used. All PCRs were performed in triplicates for each sample. PCR efficiency was calculated from the slope of the standard curves using

$$\text{Efficiency} = \left(10^{\left(\frac{-1}{\text{slope}}\right)} - 1\right) * 100$$

### Catalyzed reporter deposition fluorescent in situ hybridization

Since qPCR quantification provided information only on the depth distribution pattern of 16S rRNA copy numbers and that the used bacterial primers can also pick up cyanobacterial DNA, bacterial cells in the oxic layer were specifically counted by CARD-FISH. Oligonucleotide probe mixture (EUB338 I-III) targeting all bacteria was used (Amann et al. 1990; Daims et al. 1999). Mat samples were fixed overnight at 4°C with formaldehyde (4% final concentration). The fixed samples were washed with 1 × PBS, and stored in PBS/ethanol (1:1) at -20°C for further processing. Mat slices were homogenized using glass homogenizers and ultrasonication. The samples were subsequently filtrated on polycarbonate filters (GTTP type; pore size 0.22 μm; Millipore, Eschborn, Germany). Permeabilization of the cells, hybridization and tyramide signal amplification were performed as described by Pernthaler, Pernthaler and Amann (2002) and Snaidr et al. (1997). After hybridization, the cells were counterstained with DAPI (1 μM) and analyzed using a fluorescence microscope (Axioskop2 mot plus; AxioCam MRM, Axiovision 4.6, Zeiss, Germany). At least 1000 DAPI-stained cells were counted. Hybridization with the probe NON338 was performed as a negative control (Wallner, Amann and Beisker 1993). Thin cross-sections (5 μm; see the qPCR section) of fixed mat sample were placed onto polysine coated slides. CARD-FISH was additionally performed on mat slices with the *Chloroflexi*-specific probes GNSB-941 and CFX-1223 (Gich, Garcia-Gil and Overmann 2001; Björnsson et al. 2002), as described above.

### Isolation of AH

Isolation of AH (bacteria and archaea) from the oxic layer of the mat was performed in artificial seawater medium supplemented with different carbon sources. The medium contained MgCl<sub>2</sub>·6 H<sub>2</sub>O (5.6 g l<sup>-1</sup>), MgSO<sub>4</sub>·7 H<sub>2</sub>O (6.8 g l<sup>-1</sup>), CaCl<sub>2</sub>·2 H<sub>2</sub>O (1.47 g l<sup>-1</sup>), KCl (0.66 g l<sup>-1</sup>) and KBr (0.09 g l<sup>-1</sup>). Hypersaline media of 5 and 20% (w/v) salinity were obtained by adding appropriate amounts of NaCl. After autoclaving, KH<sub>2</sub>PO<sub>4</sub> and NH<sub>4</sub>Cl solutions were added to the medium in final concentrations of 0.15 and 0.2 g l<sup>-1</sup>, respectively. Sterile filtrated solutions of trace elements mixture (Widdel and Bak 1992), selenite and tungstate and vitamins (Heijthuisen and Hansen 1986), were then added (1 ml each l<sup>-1</sup>). Solid media were prepared with 1% (w/v) agar. Direct plating and serial dilution were used as isolation techniques. Different populations of AH were isolated at different concentrations of salinity and on different carbon sources as follows: (i) serial dilutions at two salinities (5% and 20%) using a mixture of 10 mM acetate and 5 mM succinate as a carbon source, (ii) enrichments on 0.05% *Spirulina* extract (complex polymeric substances of dead cyanobacteria) at 5% and 20% salinities and (iii) enrichment cultivation in marine broth medium (carbon source: yeast extract) at 25% salinity. Axenic strains were obtained from high dilutions by plating on agar medium containing the same carbon source. The 16S rRNA genes of the obtained

strains were sequenced and phylogenetically analyzed as described before (Abed et al. 2007).

### 16S rRNA cloning

The uppermost oxic layer (3.5 mm thickness, ca. ~100 mg wet weight) of the studied mat was subjected to nucleic acid extraction after Lueders, Manefield and Friedrich (2004). 16S rRNA cloning was carried out using the bacterial primers GM3F and GM4R (Muyzer et al. 1995) and archaeal primers 21F and 958R (DeLong 1992) at annealing temperatures of 42°C and 55°C, respectively. The PCR products were purified using the QIA quick PCR purification kit (Qiagen, Hilden, Germany) and cloned using the TOPO TA Cloning Kit (Invitrogen, Karlsruhe, Germany) according to the manufacturer's instructions. The obtained clones were screened for the presence of correct inserts, and the positive clones were then sequenced. The obtained sequences were aligned and analyzed using the ARB software (Ludwig et al. 1998) and the SILVA database (Pruesse et al. 2009). Phylogenetic trees were constructed based on long 16S rRNA sequences (>1300 bp) by applying different methods integrated in the ARB software such as maximum likelihood, maximum parsimony and neighbor joining. The latter calculation was based on a matrix of evolutionary distances determined using the Jukes-Cantor or Felsenstein equations and subject to bootstrap analysis (1000 replicates). All treeing approaches yielded similar relationships. Maximum-likelihood trees were chosen for presentation. The 16S rRNA sequence of *Escherichia coli* was included in the calculations as an outgroup sequence. The partial sequences were aligned to the sequences in the ARB database using the alignment tool of the ARB software package and then inserted into the pre-established tree using the parsimony ARB tool and maintaining the overall tree topology without changes. For determining the number of operational taxonomic units (OTU), similarity matrices among the sequences were calculated with the ARB program. One OTU was defined for sequences which have more than 97% similarity. Rarefaction curves were calculated using the freeware program aRarefactWin (available at <http://www.uga.edu/~strata/software/Software.html>). The coverage of the clone libraries was calculated as previously described by Good (1953).

### Cyanobacteria-associated AH

The AH, associated with different monoclonal strains of cyanobacteria, were identified to find out whether their identity is cyanobacterium-specific. The phylogeny of the used cyanobacterial strains can be found in Abed et al. (2008). Briefly, four strains of *Microcoleus* (M7C1, M7C3, M7C5 and S8), two strains of *Halomicronema* (M5C6 and M5C7), three strains of *Lep- tolyngbya* (M1C10, M6C11 and M4C4) and one strain each of *Cyan- othece* (M7R1) and *Phormidium* (M1C2) were used. The non-axenic cyanobacterial cultures were subjected to nucleic acid extraction after Lueders, Manefield and Friedrich (2004). Bacterial 16S rRNA genes were amplified using primers GM5F (with GC-clamp) and 907R (Muyzer et al. 1995). DGGE was carried out using a Bio-Rad D-Code system and run at 60°C and a constant voltage of 200 V for 3.5 h. DGGE bands were excised and sequenced as described before (Abed et al. 2008). The partial sequences of DGGE bands were inserted into a maximum-likelihood pre-established tree using the parsimony ARB tool as described above.

FISH of the cyanobacterial cultures was carried out to visualize and study the distribution of AH around cyanobacterial cells, using the HRP-labeled probe Cf319a to target most



members of the phylum *Bacteroidetes* (Manz et al. 1996), since most of the associated bacteria in the cultures belonged to *Bacteroidetes*. Culture samples were fixed for 2 h with formaldehyde (1% final concentration) and filtered on polycarbonate filters (GTTT type; pore-size 0.22  $\mu\text{m}$ ; Millipore). Permeabilization of the cells, hybridization and tyramide signal amplification were performed as previously described (Pernthaler, Pernthaler and Amann 2002). After hybridization, the cells were counterstained with DAPI (1  $\mu\text{M}$ ) and analyzed using a fluorescence microscope (Axioskop2 mot plus; AxioCam MRM, Axiovision 4.6, Zeiss, Germany).

### Co-culture growth experiments

Two non-axenic cyanobacterial strains (i.e. *Cyanotheca* sp. M7R1 and *Microcoleus* sp. M7C3) from the above-mentioned strains were selected to study the interactions between AH and cyanobacteria in co-cultivation experiments. Due to the difficulty to purify these strains from firmly attached heterotrophs, the closest related (>98% sequence similarity) axenic cultures of *Cyanotheca* PCC 7418 and *Microcoleus chthonoplastes* PCC 7420 were ordered from the Pasteur Culture Collection for Cyanobacteria (Paris). *Cyanotheca* PCC 7418 was grown in ASN III medium (Rippka et al. 1979), while *M. chthonoplastes* PCC 7420 was grown in MN medium (Rippka et al. 1979). Pure culture of *Flexibacter tractuosus* was ordered from the German Collection of Microorganisms and Cell Cultures (DSMZ, Braunschweig), and was grown at 25°C in 100 ml flasks (Nunc, Roskilde, Denmark) in *Cytophaga* marine medium ([www.dsmz.de](http://www.dsmz.de); medium 172). Using these cultures, the following experiments were carried out to find out:

- I. The influence of *F. tractuosus* on the growth of the axenic *M. chthonoplastes* PCC 7420. Since this cyanobacterium does not grow homogeneously, three sterile 10 ml tubes (Greiner Bio-One, Frickenhausen, Germany) with 5 ml MN medium were incubated for each time point and each tube was inoculated with 100  $\mu\text{l}$  of each strain. At each time point, the three tubes were collected and stored at -20°C until pigment extraction (see below).
- II. The influence of the AH obtained from the isolated non-axenic cyanobacterial cultures on similar axenic strains. Filtrates (filtrates 1 and 2 in Fig. S1, Supporting Information) obtained from *Cyanotheca* sp. M7R1 and *Microcoleus* sp. M7C3 cultures were added to the axenic cultures of *Cyanotheca* sp. PCC7418 and *M. chthonoplastes* PCC7420, respectively. Filtration was carried out using Isopore Membrane filters (Millipore, MA, USA) of pore size 5  $\mu\text{m}$  and 0.2  $\mu\text{m}$  to obtain filtrate with and without bacterial cells, respectively. For the experiment with *Cyanotheca* sp. PCC7418, 500  $\mu\text{l}$  of the axenic culture was added to 18 ml ASN III medium in 100 ml flasks (Nunc). Then, 500  $\mu\text{l}$  of filtrate with and without AH cells (filtrates 1 and 2, Fig. S1, Supporting Information) was added. One milliliter culture of each flask was sampled at each time point, and stored at -20°C until pigment extraction. For the experiment with *M. chthonoplastes* PCC 7420, 5 ml MN medium was added to sterile 10 ml tubes (Greiner Bio-One), 100  $\mu\text{l}$  of the axenic culture and 100  $\mu\text{l}$  of filtrate M7RI (with and without cells) were added. At each time point, three tubes were collected and stored at -20°C until pigment extraction.
- III. Upon adding filtrate M7RI to *Cyanotheca* PCC 7418, the growth of the cyanobacterium was completely inhibited. Hence, further experiments were carried out to investigate

the nature and origin of this growth inhibiting substance(s) using differently treated filtrates (i.e. centrifugation, heating, further filtration step) (Fig. S1, Supporting Information).

All growth experiments were performed in triplicates, and a control experiment without addition of other bacteria or filtrates was performed for each axenic cyanobacterial culture. All cultures were grown at 25°C with a day–night cycle of 12 h each and a light intensity of 240  $\mu\text{mol photons m}^{-2} \text{s}^{-1}$ . Inoculation was done with logarithmic-phase cultures.

### Chlorophyll a measurement

Chlorophyll a (Chl) *a* was quantified in the previous experiments and used as a proxy for cyanobacterial growth. The collected culture samples were thawed and centrifuged at 16 000 rpm, 4°C for 5 min. The supernatant was discarded and 1 ml of 99.8% ice-cold methanol (Merck, Darmstadt, Germany) was added to the pellet, followed by incubation for 2 days at -20°C. The samples were then centrifuged again at 16 000 rpm, 4°C for 10 min, and the methanol containing the extracted pigments was collected. An additional extraction was done by adding 0.5 ml methanol on the pellet, followed by sonication. The samples were incubated overnight at -20°C, and the second fraction was collected the next day after centrifugation at 16 000 rpm, 4°C for 10 min. Chl *a* was measured at a wavelength of 665 nm and corrected for turbidity by subtracting the absorbance at 750 nm (Riemann and Ernst 1982) using Perkin Elmer UV-Vis Spectrometer Lambda 20 (Buckinghamshire, England).

## RESULTS

### Quantification and spatial distribution using qPCR and CARD-FISH

qPCR showed no distinct distribution pattern of bacterial and archaeal abundances with depth (Fig. 2A and B). The copy number of bacterial 16S rRNA genes in the oxic layer reached its maximum value of  $2.1 \pm 1.7 \times 10^9$  copies  $\text{g}^{-1}$  at the depth of 0.75–1 mm. The mean values of bacterial 16S rRNA copy numbers in the oxic and anoxic layer were comparable (i.e.  $7.3 \times 10^8$  copies  $\text{g}^{-1}$ ). Archaeal 16S rRNA copy numbers were significantly higher in the anoxic than in the oxic layer ( $P < 0.005$ ). In the anoxic layer, these numbers significantly increased with depth from  $0.16 \pm 0.1 \times 10^8$  to  $1.05 \pm 0.2 \times 10^8$  copies  $\text{g}^{-1}$  of the mat. The lowest abundances of bacterial and archaeal cells were obtained at the same layer at the depth of 1.5–1.75 mm. The mean bacterial abundance in the oxic layer as determined by CARD-FISH was  $2.23 \pm 0.4 \times 10^{10}$  cells  $\text{g}^{-1}$  (Fig. 1C). The highest bacterial abundance was encountered in the layers between 2.25 and 3.25 mm.

### Diversity of AH using cultivation and molecular approaches

A total of 20 axenic bacterial and archaeal strains were obtained from enrichment cultivation. These strains were phylogenetically affiliated with *Alphaproteobacteria*, *Gammaproteobacteria*, *Actinobacteria*, *Bacteroidetes*, *Firmicutes* and *Haloarchaea* (Fig. S2, Supporting Information). Alphaproteobacterial isolates were closely related to *Caulobacter* spp. and were isolated on *Spirulina* extract at 5% salinity. All strains isolated on marine broth medium at 25% salinity belonged to the genera *Salinivibrio*, *Pseudoalteromonas*, *Idiomarina* and *Halomonas* within the class *Gammaproteobacteria*. Actinobacterial isolates grouped with *Micrococcus* spp. and were isolated on 5% ASM supplemented with

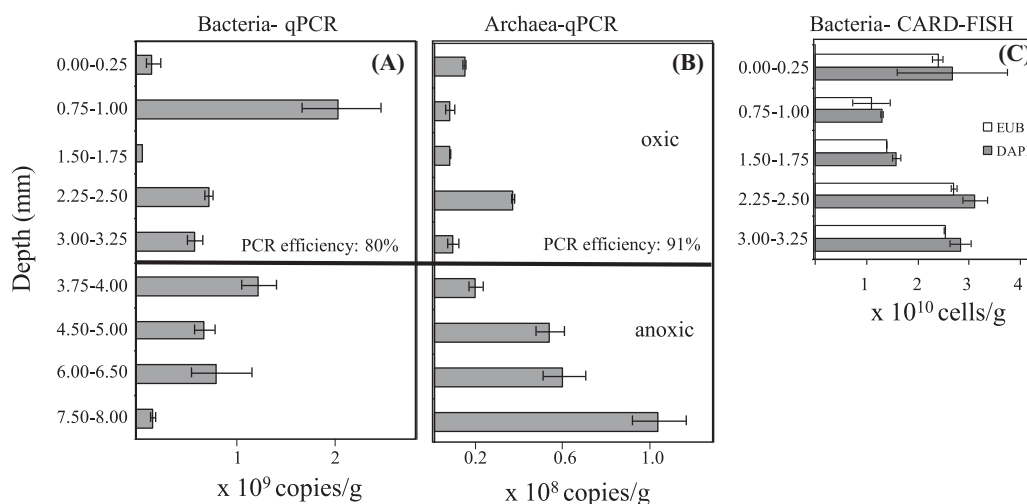

**Figure 2.** (A and B) Depth distribution of bacterial and archaeal 16S rRNA gene copy numbers (copies/g) in the mat obtained by qPCR. (C) Bacterial cell numbers (cells/g) as revealed by CARD-FISH. Error bars represent  $\pm$  standard deviation ( $n = 3$ ).

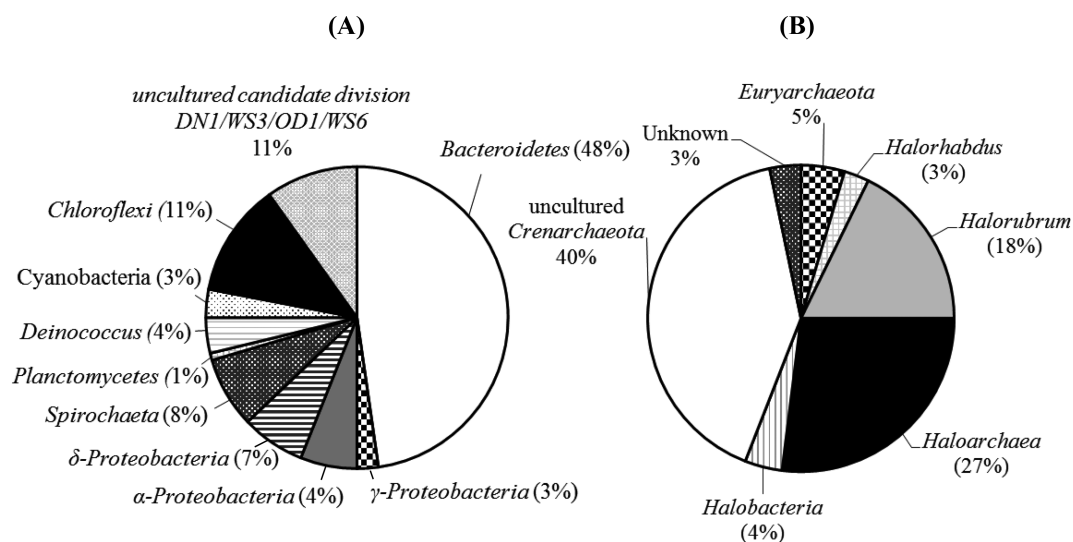

**Figure 3.** (A) Bacterial and (B) archaeal community composition retrieved by 16S rRNA cloning. Shown fractions indicate the relative percentage to the total number of clones.

acetate and succinate. Firmicutes-related strains were related to *Bacillus* spp. and were isolated at 20% salinity both on acetate and succinate as well as on *Spirulina* extract. Three archaeal isolates were enriched on ASM with *Spirulina* extract at 20% salinity and were affiliated to the genera *Halobacteria*, *Haloferax* and *Halorubrum* (Fig. S2, Supporting Information).

Based on 16S rRNA sequence similarity, 71 and 18 distinct OTUs (based on an 97% identity cut off) were identified among 132 bacterial and 152 archaeal clones, respectively. Rarefaction curves showed that the archaeal diversity was mostly covered (88% coverage) while an insufficient number of sequences was analyzed to cover the whole bacterial diversity (42% coverage) (Fig. S3, Supporting Information). In the bacterial clone library, 48% of the sequences were affiliated to *Bacteroidetes* whereas 11% were related to *Chloroflexi*-related sequences (Fig. 3A). The remaining sequences belonged to Alpha- (4%), Gamma- (3%) and Deltaproteobacteria (7%), *Spirochaeta* (8%), *Planctomycetes* (1%), *Deinococcus* (4%), uncultured candidate division OD1 and WS6 (11%) and cyanobacteria (3%) (Fig. 3A). Sequences within the Deltaproteobacteria were related to known

sulfate-reducing bacteria (SRBs) of the genera *Desulfovibrio* and *Desulfosalina*. Among the archaeal sequences, 40% were affiliated to sequences of *Crenarchaeota* and 27% to *Haloarchaea* (Fig. 3B). Sequences within the *Crenarchaeota* belonged to the marine benthic group B (MBGB). The remaining sequences were closely related to *Halorubrum* (18%), *Halorhabdus* (4%), *Halobacteria* (3%), uncultured *Euryarchaea* (5%) and archaea without known relatives (3%).

### AH associated with cyanobacterial cultures

DGGE showed that different cyanobacterial species were associated with different populations of AH (Fig. 4). The two *Microcoleus* strains M7C3 and M7C5 possessed the same associated AH, while these bacteria were different in the other cyanobacterial cultures (*Microcoleus* sp. M7C1 and *Cyanothece* sp. M7CR1), isolated from the same mat. The *Halomicronema* strains M5C6 and M5C7, which were also isolated from the same mat, showed a similar DGGE pattern of associated bacteria except for two bands (bands 45 and 46), which were only present in M5C7 strain

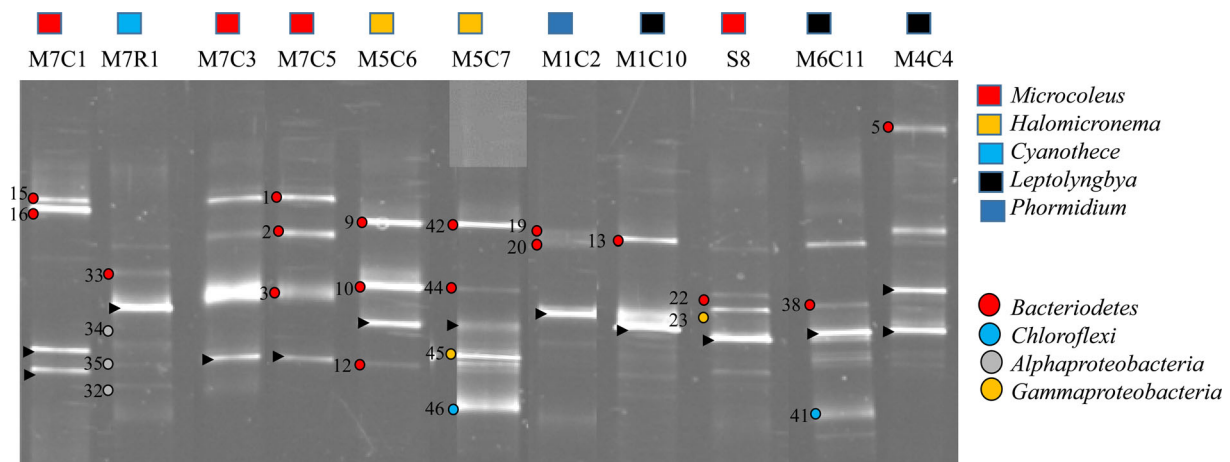

**Figure 4.** DGGE pattern of monoclonal cyanobacterial cultures with their associated AH using the bacterial primers GM5-GC and 907RC. Sequences retrieved from the associated bacteria are numbered and highlighted with a circle. Bands belonging to cyanobacteria are marked with triangle.

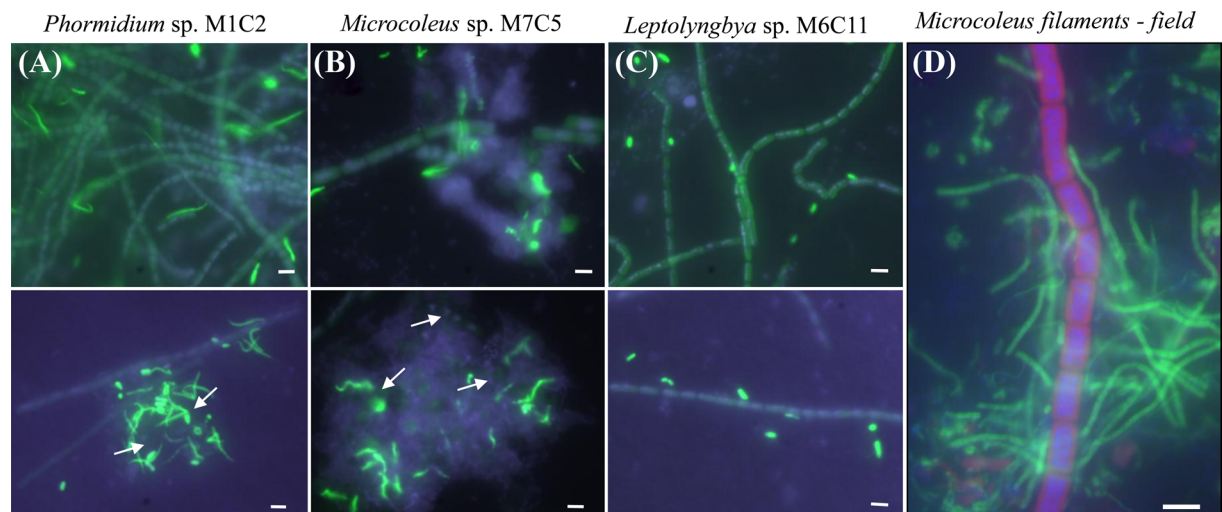

**Figure 5.** FISH (probe EUB I-III, targets all bacteria) and CARD-FISH (probe Cf319, targets *Bacteroidetes*) images of the cyanobacterial cultures *Phormidium* sp. M1C2 (A), *Microcoleus* sp. M7C5 (B) and *Leptolyngbya* sp. M6C11 (C) isolated from the mats with their attached and free-living AH. Scale bar = 2 µm. Green (Cf319) and red (EUB I-III) color show the probe signal; blue color shows the DAPI signal. The arrows indicate dead cyanobacterial cells. (D) Shows CARD-FISH of 5-µm thick cross-section of the microbial mat using probes CFX1223 and GSNB-941 specific for *Chloroflexus*-related bacteria. Green shows probe signal; pink: cyanobacterial autofluorescence; blue: DAPI signals of remaining cells. Scale bars correspond to 5 µm.

(Fig. 4). *Leptolyngbya* strains M6C11 and M1C10 varied clearly in the DGGE patterns of accompanied bacteria, although some bands were common (Fig. 4).

Phylogenetic analysis of sequences from amplifiable DGGE bands (Fig. S4, Supporting Information) revealed that most of the associated heterotrophs belonged to the phylum *Bacteroidetes*, but *Alphaproteobacteria*, *Gammaproteobacteria* and *Chloroflexi*-related bacteria were also detected. *Bacteroidetes* were detected in all cyanobacterial isolates, and sequences of this group fell mainly within the genera *Flexibacter*, *Microscilla*, *Cytophaga* and *Psychroflexus* (Fig. S4, Supporting Information). While alphaproteobacterial sequences were closely related to *Nisaea* and other environmental sequences, gammaproteobacterial sequences belonged mainly to *Salinisphaera*. Associated bacteria closely related to *Chloroflexi* were found in *Halomiconema* sp. M5C7 and *Leptolyngbya* sp. M6C11. In the unicellular culture *Cyanothecae* spp. M7RI, associated bacteria were affiliated with

the denitrifying bacteria, *Nisaea denitrificans* and *N. nitritireducens* (Fig. S4, Supporting Information).

### FISH and CARD-FISH of cyanobacterial cultures

Hybridization of *Phormidium* sp. M1C2 and *Microcoleus* sp. M7C5 with the specific probe Cf319a, which targets sequences of the *Bacteroidetes* phylum (Fig. 5A and B), showed filamentous and coccoid bacteria either firmly attached to the cyanobacterial filaments or free living in the culture (Fig. 5). Some of these bacteria were also associated with dead cyanobacterial cells (Fig. 5A and B; see arrows), and seemed involved in the breakdown of cyanobacterial filaments (Fig. 5B). Hybridization of culture M6C11 with Cf319a, showed rod-shaped bacteria attached to the cyanobacterial filaments (Fig. 5C). CARD-FISH with the *Chloroflexi*-specific probes GSNB-941 and CFX-1223 performed on 5-µm thin cross-sections of the oxic mat layer showed a

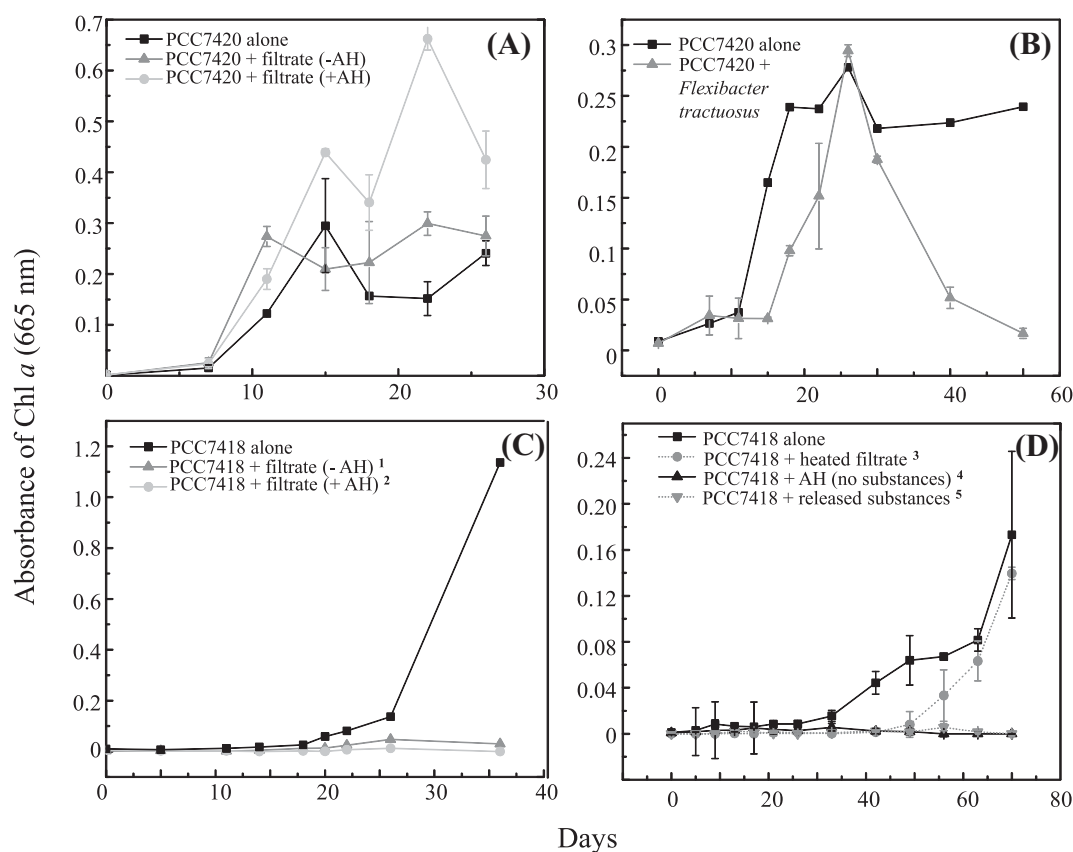

**Figure 6.** (A) Growth experiments of the axenic cyanobacterial culture of *M. chthonoplastes* PCC 7420 with the addition of filtrates (with and without AH) obtained from culture *Microcoleus* sp. M2C3. (B) Growth of *M. chthonoplastes* PCC 7420 in the presence of *F. tractuosus*. (C and D) Growth of *Cyanothece* PCC 7480 with addition of filtrates obtained from the *Cyanothece* sp. M7RI culture. Superscripted numbers refer to filtrate number in Fig. S1 (Supporting Information).

dominance of *Chloroflexi*-like bacteria in close proximity to bundles of *M. chthonoplastes* filaments (Fig. 4D). These *Chloroflexi*-like bacteria were not greenish, as for example *Chloroflexus aurantiacus*, but reddish.

### Co-cultivation experiments

Different growth experiments were carried out in order to get a better understanding of the specific interactions between cyanobacteria and AH (Fig. 6). The growth of the axenic culture of *M. chthonoplastes* PCC 7420 was enhanced upon addition of filtrates with and without AH cells, obtained from the closely related cyanobacterial culture *Microcoleus* sp. M2C3 (Fig. 6A). On the contrary, when *F. tractuosus* was added to *M. chthonoplastes* PCC 7420, the cyanobacterium first grew normally until the growth was suddenly stopped after day 28 of the experiment, followed by a rapid decrease in Chl *a* concentrations (Fig. 6B). Remarkably, filtrates obtained from the non-axenic *Cyanothece* sp. M7RI strain completely inhibited the growth of the axenic strain *Cyanothece* PCC 7418 (Fig. 6C). These filtrates had the same growth inhibitory effect on other tested cyanobacterial strains such as *Leptolyngbya* PCC 8103, *Xenococcus* PCC 7304 and *Microcoleus* PCC 7420 (data not shown). To explore the nature and origin of the inhibiting substances, the filtrates were treated in different ways (Fig. S1, Supporting Information). The addition of the filtrate after heating delayed growth of *Cyanothece* PCC 7418, as could be inferred from the longer lag phase (ca. 35 days) (Fig. 6D). Thus, heating contributed to the destruction of the inhibiting substrate(s). The M7RI associated AH (filtrate 4; Fig. S1, Supporting Information) as well as the re-

leased substances alone (filtrate 5; Fig. S1, Supporting Information) completely inhibited the growth of *Cyanothece* PCC 7418 (Fig. 6D).

### DISCUSSION

Bacterial and archaeal communities in the oxic layer of the studied cyanobacterial mat were diverse and numerically abundant. Most of the isolated strains from the mat were absent in the clone libraries, supporting the prevalently described discrepancy between cultivation and molecular techniques (e.g. Amann, Ludwig and Schleifer 1995; Felske et al. 1999). Using qPCR, the bacterial 16S rRNA copy numbers in the mat did not exhibit a distinct distribution pattern with depth. This finding is in contrast with the distribution of bacterial biomass (estimated using ATP) and pigments in the Guerrero Negro mats, which suggested a decrease in bacterial abundance from oxic to anoxic layers (Ley et al. 2006). However, it should be kept in mind that different quantification methods may yield different distribution patterns, as could be clearly observed when our qPCR and CARD-FISH depth patterns in the same mat are compared. Bacterial cell numbers determined with CARD-FISH were around two to four orders of magnitude higher than those reported by cultivation methods (Jonkers and Abed 2003; Abed et al. 2007). This variation highlights the need to use direct counting by molecular techniques. qPCR results suggested a higher dominance of bacteria than archaea in the oxic layer, whereas the latter exhibited their highest abundance in the anoxic layer. Although such higher abundance of bacteria than archaea has been previously observed in other mats such as Guerrero Negro mats (Jahnke et al.



2008), archaea were more abundant than bacteria in the hypersaline mat from Salar de Atacama, Chile (Fernandez et al. 2016). In the latter mats, the relative abundance of aerobic heterotrophic archaea decreased with depth while methanogens showed an opposite trend.

### Bacterial AH in the mat

Many of the bacterial sequences from the oxic layer of our mat were closely related to sequences obtained from other hypersaline microbial mats (Jonkers et al. 2005; Ley et al. 2006; Abed, Kohls and de Beer 2007; Robertsen et al. 2009). The major fraction of the bacterial sequences was related to *Bacteroidetes*, a group of chemoorganotrophs with the ability to digest large polysaccharides such as chitin, pectin and cellulose (Kirchman 2002; Madigan, Martinko and Parker 2001). The high abundance of *Bacteroidetes* might be due to the presence of excessive extrapolymeric substances in this mat (Abed, Kohls and de Beer 2007). *Chloroflexus* group was also predominantly encountered in this mat, which is in agreement with previous findings in hypersaline mats from Guerrero Negro (Nübel et al. 2001; Ley et al. 2006). *Chloroflexus*-like bacteria were mostly found close to cyanobacterial filaments, suggesting a strong relationship between both groups. Previous studies have also suggested a symbiotic association between cyanobacteria and *Chloroflexus*-like bacteria with the possibility of the latter group to assimilate photoautotrophically fixed carbon from cyanobacteria (Nold and Ward 1996; Ward et al. 1998). Moreover, *Chloroflexi* were found to be responsible for the entire respiration in the top approximately 1 mm of a hypersaline microbial mat from the Salada de Chiprana, Spain (Polerecky et al. 2007). The reddish *Chloroflexus*-like bacteria, found dominant in our mats, were only reported in hot spring microbial mats from Yellowstone National Park, USA (Castenholz 1984; Boomer et al. 2002) but never in hypersaline environments. *Deinococci*-related bacteria, which are mostly aerobic heterotrophic bacteria, were also found in the studied mat. This genus contains bacterial species that are resistant to very high doses of UV radiation and to prolonged periods of desiccation because of their potent DNA-repair capabilities (Moseley 1983; Minton 1994; Mattimore and Battista 1996; Carpenter, Lin and Capone 2000). These features provide these bacteria with a selective advantage to live under the extreme conditions of our mats.

Although cloning was restricted to the oxic layer of the mats, sequences related to SRBs of the genera *Desulfovibrio* and *Desulfosalina* were detected. Several studies have shown that SRBs can also be dominant and active in fully oxic zones of microbial mats (Minz et al. 1999; Fourçans et al. 2004; Jonkers et al. 2005; Ley et al. 2006). Detected biomarkers from SRBs in the top layer of a hypersaline microbial mat and their <sup>13</sup>C-uptake patterns indicated a close coupling between SRBs and cyanobacteria (Bühning et al. 2009). Thus, our results hint to a possible role of SRBs in carbon degradation in the oxic part of microbial mats.

### Archaeal AH in the mat

The high 16S rRNA copy numbers of archaea in the oxic layer of the mat indicate their abundance and a possible role in carbon cycling. Archaea could not be detectable by CARD-FISH, most likely because of suboptimal cell wall permeabilization. Few studies reported on diversity of Archaea in oxic layers of hypersaline mats (Jahnke et al. 2008; Robertson et al. 2009; Fernandez et al. 2016; Wong et al. 2016). Archaea in the oxic layer of our mat belonged to *Crenarchaeota*, *Thermoplasmatales* and *Euryarchaeota*.

These groups were also encountered in Guerrero Negro mats, Mexico (Jahnke et al. 2008), and in mats from Shark Bay, Australia (Wong et al. 2016). Interestingly, we detected a high number of sequences affiliated with *Crenarchaeota* belonging to MBGB, as designated by Vetriani et al. (1999). To the best of our knowledge, no member of this group has been isolated until now. Although *Crenarchaeota* are widespread among marine habitats (Vetriani et al. 1999; Fernandez et al. 2016), their exact metabolic activities are not fully understood (DeLong 1992; Karner, DeLong and Karl 2001; Schouten et al. 2002; Knittel et al. 2005). Because of the detection of MBGB in methane seeps, it was speculated that they could be involved in anaerobic methane oxidation (Knittel et al. 2005; Biddle et al. 2006; Cho et al. 2017) or sulfate reduction (Torres et al. 2002). However, it is yet to be demonstrated whether these anaerobic processes can occur in the fully oxic layer of hypersaline microbial mats. Indeed, high rates of methane production concomitant with high abundance of anaerobic archaea were recently shown to occur in the fully oxic layer of microbial mats from Shark Bay, Australia (Wong et al. 2016). This suggests the possibility of surface anoxic niches in microbial mats. Planktonic *Crenarchaeota* were proposed to play a role in carbon cycling with their potential to function either as strict autotrophs or as mixotrophs utilizing both CO<sub>2</sub> and organic material as carbon sources (Hallam et al. 2006). They have also the potential to use reduced nitrogen compounds like ammonia (NH<sub>3</sub>) as energy sources, fueling autotrophic metabolism, and thus might also belong to ammonium oxidizers (Hallam et al. 2006). We believe that further research is still needed to elucidate the exact role of archaea in the oxic layer of microbial mats and to isolate representative novel strains of *Crenarchaeota* and *Euryarchaeota*.

### Cyanobacteria-associated AH

Investigation of AH-cyanobacterial relationships in monocultures indicated that the community structure of AH depends on the identity of the associated cyanobacterial species. The dominance of *Bacteroidetes*- and *Chloroflexi*-related bacteria in the cyanobacterial cultures, as revealed by DGGE and CARD-FISH, is consistent with their abundances in the 16S rRNA clone library. This points out to a significant role of these two bacterial groups in the oxic layer of microbial mats. The close association of *Bacteroidetes*-related bacteria, besides *Alphaproteobacteria*, with marine cyanobacterial cultures has also been previously shown (Hube, Heyduck-Söllner and Fischer 2009). With their ability to grow chemoorganotrophically on complex polymeric substrates (Madigan, Martinko and Parker 2001; Kirchman 2002), *Bacteroidetes*-related bacteria might benefit from cyanobacterial exudates and from dead cell material. Since CARD-FISH revealed that these bacteria were often found attached to dead cell material, we speculate that they may rather grow on decaying cyanobacterial biomass than on exudates from living cyanobacteria. The beneficial association of *Chloroflexi* bacteria with cyanobacteria has also been previously described in microbial mats from Guerrero Negro, Mexico (Ley et al. 2006). It was postulated that *Chloroflexi* bacteria reduce H<sub>2</sub>S, which is inhibitory for oxygenic photosynthesis, via anoxygenic photosynthesis while cyanobacteria transfer oxygen and possibly organic carbon to the *Chloroflexi*-related bacteria.

The detection of known denitrifying and nitrite-reducing bacteria (i.e. *N. denitrificans* and *N. nitritireducens*) and the presence of the *nifH* gene (data not shown) in the *Cyanothecae* culture (M7RI) hints to a possible role of AH in nitrogen cycling. The associated bacteria might form nitrogen out of nitrate by denitrification, which could then be fixed by other bacteria or even



by the host cyanobacterium. Some bacteria are known to attach to heterocysts of *Anabena* species, promoting nitrogen fixation by respiring the oxygen around heterocysts, and thus protecting the oxygen-sensitive nitrogenase from high oxygen levels (Paerl 1976, 1982; Paerl and Keller 1978). Steppe et al. (1996) proposed a mutualistic N<sub>2</sub>-fixing consortium, where non-N<sub>2</sub>-fixing *Microcoleus* spp. provide a habitat for good growth conditions for epiphytic diazotrophic bacteria, which supply the cyanobacteria with fixed nitrogen. Interestingly, in a recent study it was shown that the cyanobacterium *Leptolyngbya nodulosa* contains a functional nitrogenase, which is not expressed in the absence of heterotrophic bacteria (Zonghikui et al. 2010).

The identity of cyanobacteria-associated AH yielded insights about the breadth of their physiological capabilities and their potential contribution to the O<sub>2</sub>, C, S and N cycles in natural cyanobacterial mats. Their activities and vertical distribution according to known physical, chemical and biological gradients suggest a role in the stratification and structuring of mats. Several taxa of *Proteobacteria* and *Bacteroidetes* have been mainly detected in the top 1–2 mm of the mat (this study; Ley et al. 2006), where the most mat-dominating cyanobacterium *M. chthonoplastes* is found and where maximal oxygenic photosynthesis is taking place. The respiration activities of these AH combined with cyanobacterial photosynthesis lead to the development of an O<sub>2</sub> gradient in the mat. On the other hand, *Chloroflexi* bacteria are expected to reside at the O<sub>2</sub>-H<sub>2</sub>S interface layer (i.e. 3–4 mm), where they receive O<sub>2</sub> and light from the top layer and H<sub>2</sub>S from the bottom layer. The depth location of *Chloroflexi* bacteria and their anoxygenic photosynthesis activity contribute also to the development of O<sub>2</sub> and H<sub>2</sub>S gradients in the mats. Thus, these variable physiological activities of AH and their complex interactions with cyanobacteria hint to a potential role in the complexity and structuring of cyanobacterial mats.

### Cyanobacteria–AH relationship

Growth experiments revealed that the released substances of AH apparently promoted the growth of its host cyanobacterium, but inhibited the growth of other potentially competitive cyanobacteria. The enhancement of *M. chthonoplastes* PCC 7420 growth upon the addition of a filtrate obtained from the closely related non-axenic culture of *Microcoleus* sp. M2C3 could be due to the release of certain growth factors and vitamins (Paerl 1996). Indeed, we observed an increase in the growth of this cyanobacterium upon the addition of vitamin B<sub>12</sub> (data not shown). AH could also remove O<sub>2</sub> and H<sub>2</sub>S and increase CO<sub>2</sub> supply, thereby protecting cyanobacteria from photooxidation and increasing their growth (Abeliovich and Shilo 1972; Eloff, Steinitz and Shilo 1976; Paerl and Keller 1978).

Unlike these beneficial relationships, some AH such as *Flexibacter* spp. have been shown to lyse cyanobacteria (Marshall 1989). This is congruent with our CARD-FISH and growth experiments data. For the lysis of cyanobacterial filaments, direct attachment of AH cells and the release of lysozyme-like substances seem to be required (Stewart and Brown 1969; Sallal 1994). The filtrate of *Cyanothece* sp. M7R1 also showed a strong bactericidal potential on *Cyanothece* PCC 7418 as well as on other cyanobacteria. The follow-up experiments with the heated and treated filtrates suggested the release of substance(s) by AH into the medium that inhibit the growth of cyanobacteria. This might be a protective mechanism for some cyanobacteria to compete against other cyanobacteria. On the other hand, it is also plausible that the filtrate may contain viruses that are capable of lysing cyanobacterial cells. Although viruses are known to be highly host-specific, their ability to cross infect closely related

cyanobacteria has also been demonstrated (Fuhrman 1999; Sullivan, Waterbury and Chisholm 2003). This could explain why all tested cyanobacterial genera were killed by the filtrate of *Cyanothece* M7R1 except the host itself. Indeed, recent studies have shown the occurrence of a very high abundance of viruses in intertidal microbial mats and suggested a possible role in microbial mortality and nutrient cycling (Pacton et al. 2014; Carreira et al. 2015). Hence, further studies are needed to elucidate the specific interaction between viruses and cyanobacteria in microbial mats.

We conclude that a diverse community of AH exist in close proximity to cyanobacteria in microbial mats and thus benefit from either their exudates and/or the produced oxygen. Most of the cyanobacteria-associated bacteria belong to *Bacteroidetes* and *Chloroflexi*. The interactions between cyanobacteria and AH are complex, specific and involve the release of substances that stimulate or inhibit the growth of each other. The production of antibiotics, toxins, signaling molecules and other secondary metabolites as effective competition and defense strategies by microorganisms represents an important resource for the discovery and development of new drugs and bioactive substances, with potential applications in medicine, industry and environmental settings. However, the real identity of the growth-inhibiting substance(s) in this study remains unclear and needs further investigations.

### SUPPLEMENTARY DATA

Supplementary data are available at [FEMSEC](https://academic.oup.com/femsec/article/94/2/fix183/4757060) online.

### ACKNOWLEDGEMENT

We gratefully acknowledge the United Arab Emirates University, Al-Ain, UAE, for their support during the field trip. Special thanks to the Hansewissenschaftskolleg (HWK) for supporting the study group of RA. We also thank Katarzyna Palinska, Ketki Tulpule and Julia Arnds for their help with the practical work. This research was financially supported by the Max Planck Society.

**Conflict of interest.** None declared.

### REFERENCES

- Abed RMM, Kohls K, de Beer D. Effect of salinity changes on the bacterial diversity, photosynthesis and oxygen consumption of cyanobacterial mats from an intertidal flat of the Arabian Gulf. *Environ Microbiol* 2007;9:1384–92.
- Abed RMM, Kohls K, Schoon R et al. Lipid biomarkers, pigments and cyanobacterial diversity of microbial mats across intertidal flats of the arid coast of the Arabian Gulf (Abu Dhabi, UAE). *FEMS Microbiol Ecol* 2008;65:449–62.
- Abed RMM, Polerecky L, Al Najjar M et al. Effect of temperature on photosynthesis, oxygen consumption and sulfide production in an extremely hypersaline cyanobacterial mat. *Aquat Microb Ecol* 2006;44:21–30.
- Abed RMM, Zein B, Al-Thukair A et al. Phylogenetic diversity and function of aerobic heterotrophic bacteria from a hypersaline oil-polluted microbial mat. *Sys Appl Microbiol* 2007;30:319–30.
- Abeliovich A, Shilo M. Photooxidative death in blue green algae. *J Bacteriol* 1972;111:682–9.
- Amann RI, Binder BJ, Olson RJ et al. Combination of 16S rRNA-targeted oligonucleotide probes with flow cytometry for analyzing mixed microbial populations. *Appl Environ Microb* 1990;56:1919–25.

- Amann R, Ludwig W, Schleifer K. Phylogenetic identification and in situ detection of individual microbial cells without cultivation. *Microbiol Rev* 1995;59:143–69.
- Baines SB, Pace ML. The production of dissolved organic matter by phytoplankton and its importance to bacteria: pattern across marine and freshwater systems. *Limnol Oceanogr* 1991;36:1078–90.
- Bateson MM, Ward MM. Photoexcretion and consumption of glycolate in a hot spring cyanobacterial mat. *Appl Environ Microb* 1988;54:1738–43.
- Behrens S, Losekann T, Pett-Ridge J et al. Linking microbial phylogeny to metabolic activity at the single-cell level by using enhanced element labeling-catalyzed reporter deposition fluorescence in situ hybridization (EL-FISH) and NanoSIMS. *Appl Environ Microb* 2008;74:3143–50.
- Biddle JF, Fitz-Gibbon S, Schuster SC et al. Heterotrophic Archaea dominate sedimentary subsurface ecosystems off Peru. *P Natl Acad Sci USA* 2006;103:3846–51.
- Björnsson L, Hugenholtz P, Tyson GW et al. Filamentous *Chloroflexi* (green non-sulfur bacteria) are abundant in wastewater treatment processes with biological nutrient removal. *Microbiology* 2002;148:2309–18.
- Boomer SM, Lodge DP, Dutton BE et al. Molecular characterization of novel red green nonsulfur bacteria from five distinct hot spring communities in Yellowstone National Park. *Appl Environ Microb* 2002;68:346–55.
- Bühning SI, Smittenberg RH, Sachse D et al. A hypersaline microbial mat from the Pacific Atoll Kiritimati: insights into composition and carbon fixation using biomarker analyses and a C-13-labeling approach. *Geobiology* 2009;7:308–23.
- Burkholder PR. Some nutritional relationships among microbes of sea sediments and waters. In: Oppenheimer CH (ed.). *Symposium on Marine Microbiology*. Springfield: C. C. Thomas, 1963, 133–50.
- Bauld J, Brock TD. Algal excretion and bacterial assimilation in hot spring algal mats. *J Phycol* 1974;10:101–6.
- Carpenter EJ, Lin S, Capone DG. Bacterial activity in South Pole snow. *Appl Environ Microb* 2000;66:4514–7.
- Carr NG, Whitton BA (eds). *The Biology of Blue-Green Algae*, Vol 9. Oxford: Blackwell Scientific Publications, 1973, 353–67.
- Carreira C, Piel T, Stall M et al. Microscale spatial distributions of microbes and viruses in intertidal photosynthetic microbial mats. *SpringerPlus* 2015;4:239.
- Castenholz RW. Composition of hot spring microbial mats: a summary. In: Cohen Y, Castenholz RW, Halvorson HO (eds). *Microbial Mats: Stromatolites*. New York: Liss, 1984, 101–19.
- Cho H, Hyun J-H, You O-R et al. Microbial community structure associated with biogeochemical processes in the sulfate-methane transition zone (SMTZ) of gas-hydrate-bearing sediment of the Ulleung Basin, East Sea. *Geomicrobiol J* 2017;34:207–19.
- Cole JJ. Interactions between bacteria and algae in aquatic ecosystems. *Annu Rev Ecol Syst* 1982;13:291–314.
- Daims H, Brühl A, Amann R et al. The domain-specific probe EUB338 is insufficient for the detection of all Bacteria: development and evaluation of a more comprehensive probe set. *Syst Appl Microbiol* 1999;22:434–44.
- DeLong EF. Archaea in coastal marine environments. *P Natl Acad Sci USA* 1992;89:277–82.
- Eloff JN, Steinitz Y, Shilo M. Photooxidation of cyanobacteria in natural conditions. *Appl Environ Microb* 1976;31:119–26.
- Epping EHG, Khalili A, Thar R. Dynamics of photosynthesis and respiration in an intertidal biofilm. *Limnol Oceanogr* 1999;44:1936–48.
- Felske A, Wolterink A, Van Lis R et al. Searching for predominant soil bacteria: 16S rDNA cloning versus strain cultivation. *FEMS Microbiol Ecol* 1999;30:137–45.
- Fernandez AB, Rasuk MC, Visscher PT et al. Microbial diversity in sediment ecosystems (evaporites domes, microbial mats, and crusts) of hypersaline Laguna Tebenquiche, Salar de Atacama, Chile. *Front Microbiol* 2016;7:1284.
- Fourçans A, García de Oteyza T, Wieland A et al. Characterization of functional bacterial groups in a hypersaline microbial mat community (Salins-de-Giraud, Camargue, France). *FEMS Microbiol Ecol* 2004;51:55–70.
- Fuhrman JA. Marine viruses and their biogeochemical and ecological effects. *Nature* 1999;399:541–8.
- Gich F, Garcia-Gil J, Overmann J. Previously unknown and phylogenetically diverse members of the green nonsulfur bacteria are indigenous to freshwater lakes. *Arch Microbiol* 2001;177:1–10.
- Good IJ. The population frequencies of species and the estimation of population parameters. *Biometrika* 1953;40:237–64.
- Gröttschel S, Köster J, Abed RMM et al. Degradation of petroleum model compounds immobilized on clay by a hypersaline microbial mat. *Biodegradation* 2002;13:273–83.
- Hallam SJ, Mincer TJ, Schleper C et al. Pathways of carbon assimilation and ammonia oxidation suggested by environmental genomic analyses of marine Crenarchaeota. *PLoS Biol* 2006;4:520–36.
- Heijthuijsen J, Hansen T. Interspecies hydrogen transfer in co-cultures of methanol-utilizing acidogens and sulfate-reducing or methanogenic bacteria. *FEMS Microbiol Ecol* 1986;38:57–64.
- Herbst V, Overbeck J. Metabolic coupling between the alga *Oscillatoria redekei* and accompanying bacteria. *Naturwissenschaften* 1978;65:598–9.
- Hube AE, Heyduck-Söllner B, Fischer U. Phylogenetic classification of heterotrophic bacteria associated with filamentous marine cyanobacteria in culture. *Sys Appl Microbiol* 2009;32:256–65.
- Jahnke LL, Orphan VJ, Embaye T et al. Lipid biomarker and phylogenetic analyses to reveal archaeal biodiversity and distribution in hypersaline microbial mat and underlying sediment. *Geobiology* 2008;6:394–410.
- Jonkers HM, Abed RMM. Identification of aerobic heterotrophic bacteria from the photic zone of a hypersaline microbial mat. *Aquat Microb Ecol* 2003;30:127–33.
- Jonkers HM, Koh I-O, Behrend P et al. Aerobic organic carbon mineralization by sulfate-reducing bacteria in the oxygen-saturated photic zone of a hypersaline microbial mat. *Microb Ecol* 2005;49:1–10.
- Karner MB, DeLong EF, Karl DM. Archaeal dominance in the mesopelagic zone of the Pacific Ocean. *Nature* 2001;409:507–10.
- Kirchman DL. The ecology of Cytophaga-Flavobacteria in aquatic environments. *FEMS Microbiol Ecol* 2002;39:91–100.
- Kirkwood AE, Nalewajko C, Fulthorpe RR. The effects of cyanobacterial exudates on bacterial growth and biodegradation of organic contaminants. *Microb Ecol* 2006;51:4–12.
- Knittel K, Losekann T, Boetius A et al. Diversity and distribution of methanotrophic archaea at cold seeps. *Appl Environ Microb* 2005;71:467–79.
- Lange W. Effect of carbohydrates on the symbiotic growth of planktonic blue-green algae with bacteria. *Nature* 1967;215:1277–8.

- Ley RE, Harris JK, Wilcox J et al. Unexpected diversity and complexity of the Guerrero Negro hypersaline microbial mat. *Appl Environ Microb* 2006;**72**:3685–95.
- Ludwig W, Strunk O, Klugbauer S et al. Bacterial phylogeny based on comparative sequence analysis. *Electrophoresis* 1998;**19**:554–68.
- Lueders T, Manefield M, Friedrich MW. Enhanced sensitivity of DNA- and rRNA-based stable isotope probing by fractionation and quantitative analysis of isopycnic centrifugation gradients. *Environ Microbiol* 2004;**6**:73–8.
- Manz W, Amann R, Ludwig W et al. Application of a suite of 16S rRNA-specific oligonucleotide probes designed to investigate bacteria of the phylum cytophaga-flavobacter-bacteroides in the natural environment. *Microbiology* 1996;**142**:1097–106.
- Madigan MT, Martinko JM, Parker J. In: Goebel W (ed.). *Brock Mikrobiologie Spektrum*, Heidelberg, 2001.
- Marshall KC. Cyanobacterial-heterotrophic bacterial interaction. In: Cohen Y, Rosenberg E (eds). *Microbial Mats: Physiological Ecology of Benthic Microbial Communities*. Washington, DC: American Society of Microbiology, 1989, 239–45.
- Mattimore V, Battista JR. Radioresistance of *Deinococcus radiodurans*: functions necessary to survive ionizing radiation are also necessary to survive prolonged desiccation. *J Bacteriol* 1996;**178**:633–7.
- Minton KW. DNA repair in the extremely radioresistant bacterium *Deinococcus radiodurans*. *Mol Microbiol* 1994;**13**:9–15.
- Minz D, Fishbain S, Green SJ et al. Unexpected population distribution in a microbial mat community: sulfate-reducing bacteria localized to the highly oxic chemocline in contrast to a eukaryotic preference for anoxia. *Appl Environ Microb* 1999;**65**:4659–65.
- Moseley BEB. Photobiology and radiobiology of *Micrococcus (Deinococcus) radiodurans*. *Photochem Photobiol Rev* 1983;**7**:223–75.
- Muyzer G, Teske A, Wirsén CO et al. Phylogenetic relationships of Thiomicrospira species and their identification in deep-sea hydrothermal vent samples by denaturing gradient gel electrophoresis of 16S rDNA fragments. *Arch Microbiol* 1995;**164**:165–72.
- Nadkarni MA, Martin FE, Jacques NA et al. Determination of bacterial load by real-time PCR using a broad-range (universal) probe and primers set. *Microbiology* 2002;**148**:257–66.
- Nold SC, Ward DM. Photosynthate partitioning and fermentation in hot spring microbial mat communities. *Appl Environ Microb* 1996;**62**:4598–607.
- Nübel U, Bateson MM, Madigan MT et al. Diversity and distribution in hypersaline microbial mats of bacteria related to *Chloroflexus* spp. *Appl Environ Microb* 2001;**67**:4365–71.
- Pacton M, Wacey D, Corinaldesi C et al. Viruses as new agents of organomineralization in the geological record. *Nat Commun* 2014;**5**:4298
- Paerl HW. Specific association of the blue-green algae *Anabaena* and *Aphanizomenon* with bacteria in freshwater bloom. *J Phycol* 1976;**12**:431–5.
- Paerl HW. Interactions with bacteria. In: Carr NG, Whitton BA (eds). *The Biology of Cyanobacteria*. Oxford: Botanical Monographs Blackwell, 1982, 241–462.
- Paerl HW. Microscale physiological and ecological studies of aquatic cyanobacteria: macroscale implications. *Microsc Res Technol* 1996;**33**:47–72.
- Paerl HW, Kellar PE. Significance of bacterial *Anabaena* (Cyanophyceae) associations with respect to N<sub>2</sub> fixation in aquatic habitats. *J Phycol* 1978;**14**:254–60
- Pernthaler A, Pernthaler J, Amann R. Fluorescence in situ hybridization and catalyzed reporter deposition for the identification of marine bacteria. *Appl Environ Microb* 2002;**68**:3094–101.
- Pett-Ridge J, Weber PK. NanoSIP: NanoSIMS applications for microbial ecology. *Methods Mol Biol* 2012;**881**:375–408.
- Polerecky L, Bachar A, Schoon R et al. Contribution of *Chloroflexus* respiration to oxygen cycling in a hypersaline microbial mat from Lake Chiprana, Spain. *Environ Microbiol* 2007;**9**:2007–24.
- Pruesse E, Quast C, Knittel K et al. SILVA: a comprehensive online resource for quality checked and aligned ribosomal RNA sequence data compatible with ARB. *Nucleic Acids Res* 2007;**35**:7188–96.
- Rashidan KK, Bird DF. Role of predatory cyanobacteria in the termination of cyanobacterial bloom. *Microb Ecol* 2001;**41**:97–105.
- Riemann BO, Ernst, D. Extraction of chlorophylls *a* and *b* from phytoplankton using standard extraction techniques. *Freshwater Biol* 1982;**12**:217–23.
- Rippka R, Deruelles J, Waterbury JB et al. Generic assignments, strain histories and properties of pure cultures of cyanobacteria. *J Gen Microbiol* 1979;**111**:1–61.
- Robertson CE, Spear JR, Harris JK et al. Diversity and stratification of archaea in a hypersaline microbial mat. *Appl Environ Microb* 2009;**75**:1801–10.
- Sallal AK. Lysis of cyanobacteria with *Flexibacter* spp. isolated from domestic sewage. *Microbios* 1994;**77**:57–67.
- Schouten S, Hopmans EC, Schefuss E et al. Distributional variations in marine crenarchaeotal membrane lipids: a new tool for reconstructing ancient sea water temperatures. *Earth Planet Sc Lett* 2002;**204**:265–74.
- Shilo M. Lysis of blue-green algae by myxobacter. *J Bacteriol* 1970;**104**:453–61.
- Snaird J, Amann R, Huber I et al. Phylogenetic analysis and in situ identification of bacteria in activated sludge. *Appl Environ Microb* 1997;**63**:2884–96.
- Steppe TF, Olson JB, Paerl HW et al. Consortial N<sub>2</sub> fixation: a strategy for meeting nitrogen requirements of marine and terrestrial cyanobacterial mats. *FEMS Microbiol Ecol* 1996;**21**:149–56.
- Stewart J, Brown R. *Cytophaga* that kills or lyses algae. *Science* 1969;**164**:1523–4.
- Sullivan MB, Waterbury JB, Chisholm SW. Cyanophages infecting the oceanic cyanobacterium *Prochlorococcus*. *Nature* 2003;**426**:584.
- Takai K, Horikoshi K. Rapid detection and quantification of members of the archaeal community by quantitative PCR using fluorogenic probes. *Appl Environ Microb* 2000;**66**:5066–72.
- Torres ME, McManus J, Hammond D et al. Fluid and chemical fluxes in and out of sediments hosting methane hydrate deposits on Hydrate Ridge, OR. I. Hydrological provinces. *Earth Planet Sc Lett* 2002;**201**:525–40.
- Van Gernerden H. Microbial mats: a joint of venture. *Mar Geol* 1993;**113**:3–25.
- Vetriani C, Jannasch HW, Macgregor BJ et al. Population structure and phylogenetic characterization of marine benthic archaea in deep-sea sediments. *Appl Environ Microb* 1999;**65**:4375–84
- Wallner G, Amann R, Beisker W. Optimizing fluorescent in situ hybridization with rRNA-targeted oligonucleotide probes for flow cytometric identification of microorganisms. *Cytometry* 1993;**14**:136–43.
- Wang L, Priscu JC. Stimulation of aquatic bacterial activity by cyanobacteria. *Hydrobiologia* 1994;**277**:145–58.



- Ward DM, Ferris MJ, Nold SJ et al. A natural view of microbial biodiversity within hot spring cyanobacterial mat communities. *Microbiol Mol Biol R* 1998;**62**:1353–70.
- Widdel F, Bak F. Gram-negative mesophilic sulfate-reducing bacteria. In: Balows A, Trüper HG, Dworkin M et al. (eds). *The Prokaryotes*, 2nd edn. New York: Springer, 1992, 3353–78.
- Wieland A, Kühl M. Irradiance and temperature regulation of oxygenic photosynthesis and O<sub>2</sub> consumption in a hypersaline cyanobacterial mat (Solar Lake, Egypt). *Mar Biol* 2000;**137**:71–85.
- Wieland A, Kühl M. Regulation of photosynthesis and oxygen consumption in a hypersaline cyanobacterial mat (Camargue, France) by irradiance, temperature and salinity. *FEMS Microbiol Ecol* 2006;**55**:195–210.
- Wong HL, Visscher PT, White RA, III et al. Dynamics of archaea at fine spatial scales in Shark Bay mat microbiomes. *Sci Rep* 2016;**7**:46160.
- Zhongkui L, Jingjie Y, Kyoung-Rae K et al. Nitrogen fixation by a marine non-heterocystous cyanobacterium requires a heterotrophic bacterial consort. *Environ Microbiol* 2010;**5**: 1185–93.
